# Supplementary material for: Long-term outcomes by bone marrow B-cell depletion from the R2W trial of bortezomib with cyclophosphamide and rituximab in Waldenstrőm macroglobulinaemia
Source: Research Square preprint supplement (doi:10.21203/rs.3.rs-3252644/v1), 2023-09-19
Supplement: Supplementary file 1 [file 9d684be0726cd179f3bb1672.xlsx]

## Sheet: Sheet1
Table 2.
Maximum grade 3-5 adverse events – BCR who started trial treatment (N=42)
Adverse Event	BCR
	(N=42)
Neutrophil count decreased	11* (26%)
Platelet count decreased	6** (14%)
Anaemia	5 (12%)
Febrile neutropenia	1 (2%)
Rituximab infusion reaction	1 (2%)
Hyponatremia	0 (0%)
Diarrhoea	2 (5%)
Pain	2 (5%)
Sepsis	0 (0%)
Alanine aminotransferase increased	0 (0%)
Lymphocyte count decreased	0 (0%)
Orchitis	0 (0%)
Upper respiratory infection	0 (0%)
Back pain	1 (2%)
Hearing impairment	1 (2%)
Heart failure	1 (2%)
Hypertension	1 (2%)
Hypotension	1 (2%)
Lung infection	1 (2%)
Neoplasms benign, malignant and unspecified	1 (2%)
Renal impairment	1 (2%)
HIGHEST GRADE TOXICITY
3	24 (57%)
4	3 (7%)
5	0 (0%)
ANY GRADE 3-5 TOXICITY	27 (64%)
*including 1x grade 4; **2x grade 4
