# Supplementary material for: Long-term outcomes by bone marrow B-cell depletion from the R2W trial of bortezomib with cyclophosphamide and rituximab in Waldenstrőm macroglobulinaemia
Source: Research Square preprint supplement (doi:10.21203/rs.3.rs-3252644/v1), 2023-09-19
Supplement: Supplementary file 2 [file ff916b89e1444bc56b6e6135.xlsx]

## Sheet: Sheet1
Table 1.
Baseline characteristics – BCR (N=43)
Baseline Characteristic	BCR
	(N=43)
Age in years, median (range)	67 (43,78)
Gender, n (%)
Female	14 (33%)
Male	29 (67%)
IPSSWM risk group, n (%)
Low	12 (28%)
Intermediate	12 (28%)
High	19 (44%)
ECOG performance status, n (%)
0	18 (42%)
1	23 (53%)
2	2 (5%)
Lymphadenopathy present, n (%)	12 (28%)
Hepatomegaly present, n (%)	2 (5%)
Splenomegaly present, n (%)	7 (16%)
B Symptoms present, n (%)	9 (21%)
Signs of hyperviscosity present, n (%)	28 (65%)
Peripheral neuropathy present, n (%)	8 (19%)
White blood cell x109/L, median (range)	6.2 (2.8,10.5)
Platelets x109/L, median (range)	200.0 (4.0,510.0)
Haemoglobin g/dL, median (range)	9.8 (6.5,14.0)
Absolute neutrophil count x109/L, median (range)	3.3 (1.4,7.2)
Lymphocytes x109/L, median (range)	1.7 (0.1,4.1)
Serum IgM paraprotein g/L, median (range)	32.0 (3.2,80.2)
